# Supplementary material for: Integrating External Controls by Regression Calibration for Genome-Wide Association Study
Source: MDPI journal article supplement (doi:10.3390/genes15010067), 2024-01-03
Supplement: s1 [file s1]

## **Supplementary Materials**

### **Integrating external controls by regression calibration for genome-wide association study**

Lirong Zhu<sup>1</sup>, Shijia Yan<sup>1</sup>, Xuewei Cao<sup>1</sup>, Shuanglin Zhang<sup>1</sup>, Qiuying Sha<sup>1,\*</sup>

<sup>1</sup>Department of Mathematical Sciences, Michigan Technological University, Houghton, Michigan, USA

\*Corresponding author: Qiuying Sha, Department of Mathematical Sciences, Michigan Technological University, Houghton, Michigan 49931, USA. E-mail: qsha@mtu.edu

**Table S1.** Empirical type I error rates of iECAT-RC, compared with other three methods iECAT-N, Internal, and iECAT-Score at different significance levels, 0.05, 0.01,  $10^{-3}$  and  $10^{-4}$  with  $DVS = 0.5$ .

| Model   | Significance level | iECAT-RC           | iECAT-N       | Internal           | iECAT-Score        |
|---------|--------------------|--------------------|---------------|--------------------|--------------------|
| Model 1 | 0.05               | 0.033              | <b>0.3895</b> | 0.05               | 0.0457             |
|         | 0.01               | 0.0057             | <b>0.3285</b> | 0.0102             | 0.0077             |
|         | 0.001              | $3 \times 10^{-4}$ | <b>0.2762</b> | 0.0012             | $9 \times 10^{-4}$ |
|         | $1 \times 10^{-4}$ | 0                  | <b>0.2386</b> | $2 \times 10^{-4}$ | 0                  |
| Model 2 | 0.05               | 0.0529             | <b>0.4083</b> | 0.0343             | 0.0449             |
|         | 0.01               | 0.0109             | <b>0.357</b>  | 0.0089             | 0.0111             |
|         | 0.001              | $7 \times 10^{-4}$ | <b>0.3217</b> | $9 \times 10^{-4}$ | 0.0016             |
|         | $1 \times 10^{-4}$ | $1 \times 10^{-4}$ | <b>0.2912</b> | $1 \times 10^{-4}$ | 0                  |
| Model 3 | 0.05               | 0.0464             | <b>0.1334</b> | 0.0139             | 0.0377             |
|         | 0.01               | 0.0103             | <b>0.0829</b> | 0.0037             | 0.0066             |
|         | 0.001              | $9 \times 10^{-4}$ | <b>0.0513</b> | $5 \times 10^{-4}$ | $8 \times 10^{-4}$ |
|         | $1 \times 10^{-4}$ | 0                  | <b>0.0364</b> | 0                  | 0                  |
| Model 4 | 0.05               | 0.0323             | <b>0.4163</b> | 0.042              | 0.0407             |
|         | 0.01               | 0.0052             | <b>0.3292</b> | 0.0089             | 0.0082             |
|         | 0.001              | $6 \times 10^{-4}$ | <b>0.2608</b> | 0.0013             | $4 \times 10^{-4}$ |
|         | $1 \times 10^{-4}$ | $2 \times 10^{-4}$ | <b>0.2231</b> | $3 \times 10^{-4}$ | 0                  |
| Model 5 | 0.05               | 0.0501             | <b>0.475</b>  | 0.0327             | 0.0492             |
|         | 0.01               | 0.0117             | <b>0.4002</b> | 0.0097             | 0.0087             |
|         | 0.001              | 0.0016             | <b>0.3289</b> | 0.0011             | 0.0016             |
|         | $1 \times 10^{-4}$ | 0                  | <b>0.2775</b> | $1 \times 10^{-4}$ | $4 \times 10^{-4}$ |
| Model 6 | 0.05               | 0.0453             | <b>0.1017</b> | 0.0139             | 0.0316             |
|         | 0.01               | 0.0102             | <b>0.0546</b> | 0.0044             | 0.0072             |
|         | 0.001              | 0.0012             | <b>0.028</b>  | $8 \times 10^{-4}$ | $7 \times 10^{-4}$ |
|         | $1 \times 10^{-4}$ | 0                  | <b>0.0158</b> | $1 \times 10^{-4}$ | 0                  |

Notes: Type I error rates are evaluated based on  $5 \times 10^5$  simulations. The bold-faced values indicate the type I error rates beyond the upbound of the corresponding 95% confidence interval.

**Table S2.** The relative frequency of significant SNPs identified by each method using 10,000 repeated samples.

| <b>Chr</b> | <b>SNP</b> | <b>Base Position</b> | <b>iECAT-RC</b> | <b>iECAT-Score</b> | <b>Internal</b> |
|------------|------------|----------------------|-----------------|--------------------|-----------------|
| 22         | rs62228062 | 46381234             | 95.3%           | 79.5%              | 37.4%           |
| 22         | rs9330811  | 46362396             | 54.3%           | 38.8%              | 3.9%            |
| 22         | rs28628653 | 46396925             | 34.7%           | 15.2%              | 1.1%            |
| 7          | rs2290221  | 37987632             | 11.2%           | 1.8%               | 0.0%            |
| 22         | rs9626908  | 46428306             | 8.3%            | 0.7%               | 0.2%            |
| 9          | rs12685782 | 135320210            | 6.3%            | 0.2%               | 0.1%            |
| 22         | rs28520003 | 46411969             | 5.0%            | 0.2%               | 0.1%            |

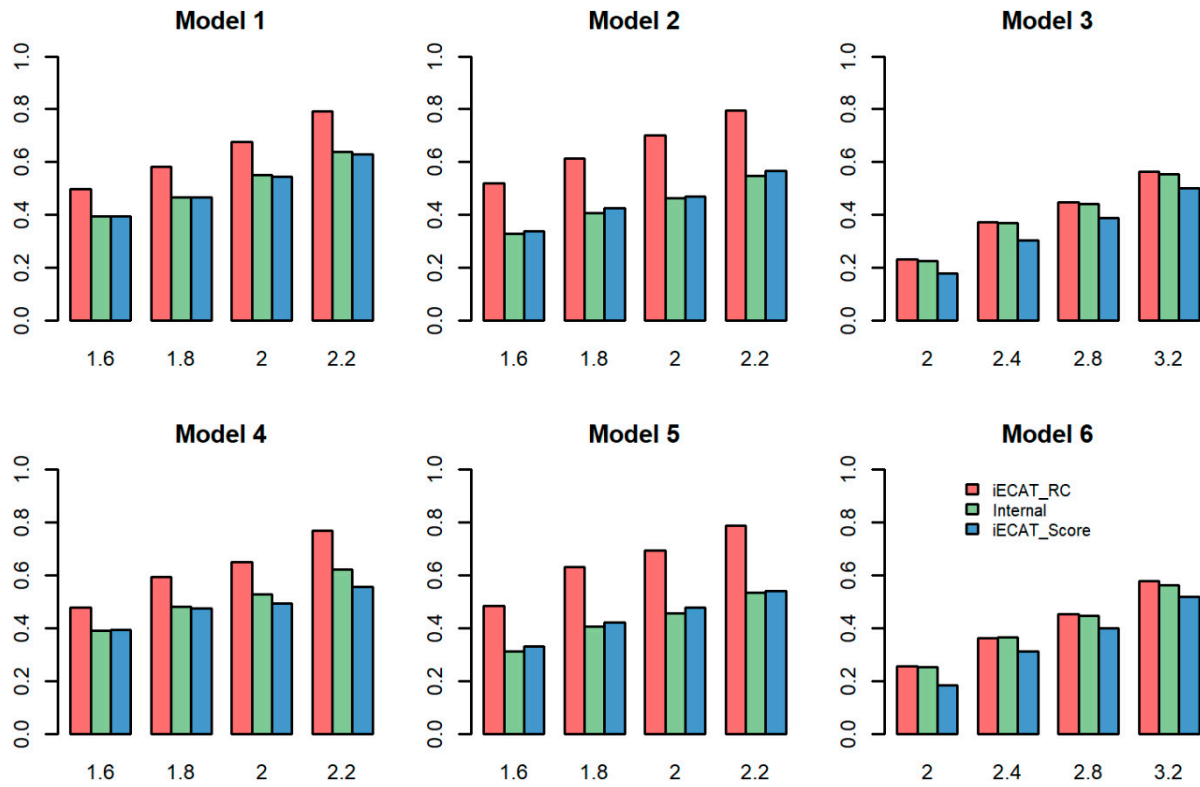

**Figure S1.** The power comparison of iECAT-RC, Internal, and iECAT-Score when  $DVS = 0.5$  at the significance level of  $5 \times 10^{-8}$ . The horizontal axis represents the odds ratio, and the vertical axis represents power.
